# Supplementary material
Source: PubMed Central journal article supplement (PMC10404475)
Supplement: NIHMS1895161-supplement-Supplemental_Table_1.pdf [file NIHMS1895161-supplement-Supplemental_Table_1.pdf]

ONLINE ONLY

## Supplemental material

### Balancing task sensitivity with reliability for multimodal language assessments

Aabedi et al.

<https://thejns.org/doi/abs/10.3171/2020.10.JNS202947>

**DISCLAIMER** The *Journal of Neurosurgery* acknowledges that the following section is published verbatim as submitted by the authors and did not go through either the *Journal's* peer-review or editing process.

**SUPPLEMENTAL TABLE 1. Trial Set Availability by Subject**

| Subject | PREOP             |                   |                   |                     |                       | INTRAOP           |                   |                   |                     |                       |
|---------|-------------------|-------------------|-------------------|---------------------|-----------------------|-------------------|-------------------|-------------------|---------------------|-----------------------|
|         | PN<br>(48 trials) | TR<br>(27 trials) | AN<br>(32 trials) | 4SYL<br>(86 trials) | SYNTAX<br>(28 trials) | PN<br>(48 trials) | TR<br>(27 trials) | AN<br>(32 trials) | 4SYL<br>(86 trials) | SYNTAX<br>(28 trials) |
| 1       | X                 | X                 | X                 | X                   | X                     | X                 | X                 | X                 | X                   | X                     |
| 2       | X                 | X                 | X                 | X                   | X                     | X                 | X                 | X                 | X                   | X                     |
| 3       | X                 | X                 | X                 | X                   | X                     | X                 | X                 | X                 | X                   | X                     |
| 4       | X                 | X                 | X                 | X                   | X                     | X                 | X                 | X                 | X                   | X                     |
| 5       | X                 | X                 | X                 | X                   | X                     | X                 | X                 | X                 | X                   | X                     |
| 6       | X                 | X                 | X                 | X                   | X                     | X                 | X                 | X                 | X                   | X                     |
| 7       | X                 | X                 | X                 | X                   | X                     | X                 | X                 | X                 | O                   | O                     |
| 8       | X                 | X                 | X                 | X                   | X                     | X                 | X                 | X                 | X                   | X                     |
| 9       | X                 | X                 | X                 | X                   | X                     | X                 | X                 | X                 | X                   | X                     |
| 10      | X                 | X                 | X                 | X                   | X                     | X                 | X                 | X                 | X                   | O                     |
| 11      | X                 | X                 | X                 | X                   | X                     | X                 | X                 | X                 | X                   | X                     |
| 12      | X                 | X                 | X                 | X                   | X                     | X                 | X                 | X                 | X                   | X                     |
| 13      | X                 | X                 | X                 | X                   | X                     | X                 | X                 | X                 | X                   | X                     |
| 14      | X                 | X                 | X                 | X                   | X                     | X                 | X                 | X                 | X                   | X                     |
| 15      | X                 | X                 | X                 | X                   | X                     | X                 | X                 | X                 | X                   | X                     |
| 16      | X                 | X                 | X                 | X                   | X                     | X                 | X                 | X                 | X                   | X                     |
| 17      | X                 | X                 | X                 | X                   | X                     | X                 | X                 | X                 | X                   | X                     |
| 18      | X                 | X                 | X                 | X                   | X                     | X                 | X                 | X                 | X                   | X                     |
| 19      | X                 | X                 | X                 | X                   | X                     | X                 | X                 | X                 | X                   | X                     |
| 20      | X                 | X                 | X                 | X                   | X                     | X                 | X                 | X                 | X                   | X                     |
| 21      | X                 | X                 | X                 | X                   | X                     | X                 | X                 | X                 | X                   | X                     |
| 22      | X                 | X                 | X                 | X                   | X                     | X                 | X                 | X                 | X                   | X                     |
| 23      | X                 | X                 | X                 | X                   | X                     | X                 | X                 | X                 | X                   | X                     |
| 24      | X                 | X                 | X                 | X                   | X                     | X                 | X                 | X                 | X                   | X                     |
| 25      | X                 | X                 | X                 | X                   | X                     | X                 | X                 | X                 | O                   | X                     |
| 26      | X                 | X                 | X                 | X                   | X                     | X                 | X                 | X                 | O                   | X                     |
| 27      | X                 | X                 | X                 | X                   | X                     | X                 | X                 | X                 | X                   | X                     |
| 28      | X                 | X                 | X                 | X                   | X                     | X                 | X                 | X                 | X                   | X                     |
| 29      | X                 | X                 | X                 | X                   | X                     | X                 | X                 | X                 | X                   | X                     |
| 30      | X                 | X                 | X                 | X                   | X                     | X                 | X                 | X                 | X                   | X                     |
| 31      | X                 | X                 | X                 | X                   | X                     | X                 | X                 | X                 | X                   | X                     |
| 32      | X                 | X                 | X                 | X                   | X                     | X                 | X                 | X                 | X                   | X                     |
| 33      | X                 | X                 | X                 | X                   | X                     | X                 | X                 | X                 | X                   | X                     |
| 34      | X                 | X                 | X                 | X                   | X                     | X                 | X                 | X                 | X                   | X                     |
| 35      | X                 | X                 | X                 | X                   | X                     | X                 | X                 | X                 | X                   | X                     |
| 36      | X                 | X                 | X                 | X                   | X                     | X                 | X                 | X                 | X                   | X                     |
| 37      | X                 | X                 | O                 | O                   | X                     | X                 | X                 | X                 | O                   | X                     |
| 38      | X                 | X                 | X                 | X                   | X                     | X                 | X                 | O                 | O                   | X                     |
| 39      | X                 | X                 | X                 | X                   | X                     | X                 | X                 | X                 | X                   | X                     |
| 40      | X                 | X                 | X                 | X                   | X                     | X                 | X                 | X                 | X                   | X                     |
| 41      | X                 | X                 | X                 | X                   | X                     | X                 | X                 | X                 | X                   | X                     |
| 42      | X                 | X                 | X                 | X                   | X                     | X                 | X                 | X                 | X                   | X                     |
| 43      | X                 | X                 | X                 | X                   | X                     | X                 | X                 | X                 | X                   | X                     |
| 44      | X                 | X                 | X                 | X                   | X                     | X                 | X                 | X                 | X                   | X                     |

“X” denotes patient successfully completed the full set of trials within the specified task while “O” denotes that the patient requested to temporarily halt testing.
